# Supplementary material for: Handheld Navigation Improves Accuracy in Direct Anterior Total Hip Replacement
Source: PubMed Central journal article supplement — Arthroplast Today. 2022 Aug 15;17:58–65. doi: 10.1016/j.artd.2022.06.016 (PMC9399378; doi:10.1016/j.artd.2022.06.016), 2022-08-15
Supplement: mmc3.pdf [file mmc3.pdf]

# INDIVIDUAL CONFLICT OF INTEREST STATEMENT

## *American Association of Hip and Knee Surgeons*

(Adopted from the American Academy of Orthopaedic Surgeons disclosure statement)

The following form **must be filled out completely and submitted by each author (example, 6 authors, 6 forms).** **All items require a response. If there is no relevant disclosure for a given item, enter "None."**

**Handheld Navigation Improves Accuracy in Direct Anterior Total Hip Replacement**

---

### Manuscript Title

1. Royalties from a company or supplier (The following conflicts were disclosed)

NONE.

2. Speakers bureau/paid presentations for a company or supplier (The following conflicts were disclosed)

NONE.

3A. Paid employee for a company or supplier (The following conflicts were disclosed)

NONE.

3B. Paid consultant for a company or supplier (The following conflicts were disclosed)

NONE.

3C. Unpaid consultants for a company or supplier (The following conflicts were disclosed)

NONE.

4. Stock or stock options in a company or supplier (The following conflicts were disclosed)

NONE.

5. Research support from a company or supplier as a Principal Investigator (The following conflicts were disclosed)

NONE.

6. Other financial or material support from a company or supplier (The following conflicts were disclosed)

NONE.

7. Royalties, financial or material support from publishers (The following conflicts were disclosed)

NONE.

8. Medical/Orthopaedic publications editorial/governing board (The following conflicts were disclosed)

NONE.

9. Board member/committee appointments for a society (The following conflicts were disclosed)

NONE.

**Each author must sign AND print or type his/her name, date and submit a separate form**

In addition, one BLINDED Conflict of Interest form (no author names used) should be submitted per manuscript with all author disclosures.

JESSE A. RASZEWSKI, DO, MS



12/10/2021

Author Name (Print or Type)

Author Signature

Date
